# Supplementary material for: Pharmacokinetic Properties of Baitouweng Decoction in Bama Miniature Pigs: Implications for Clinical Application in Humans
Source: Hindawi journal article supplement (doi:10.1155/2024/5535752), 2024-05-10

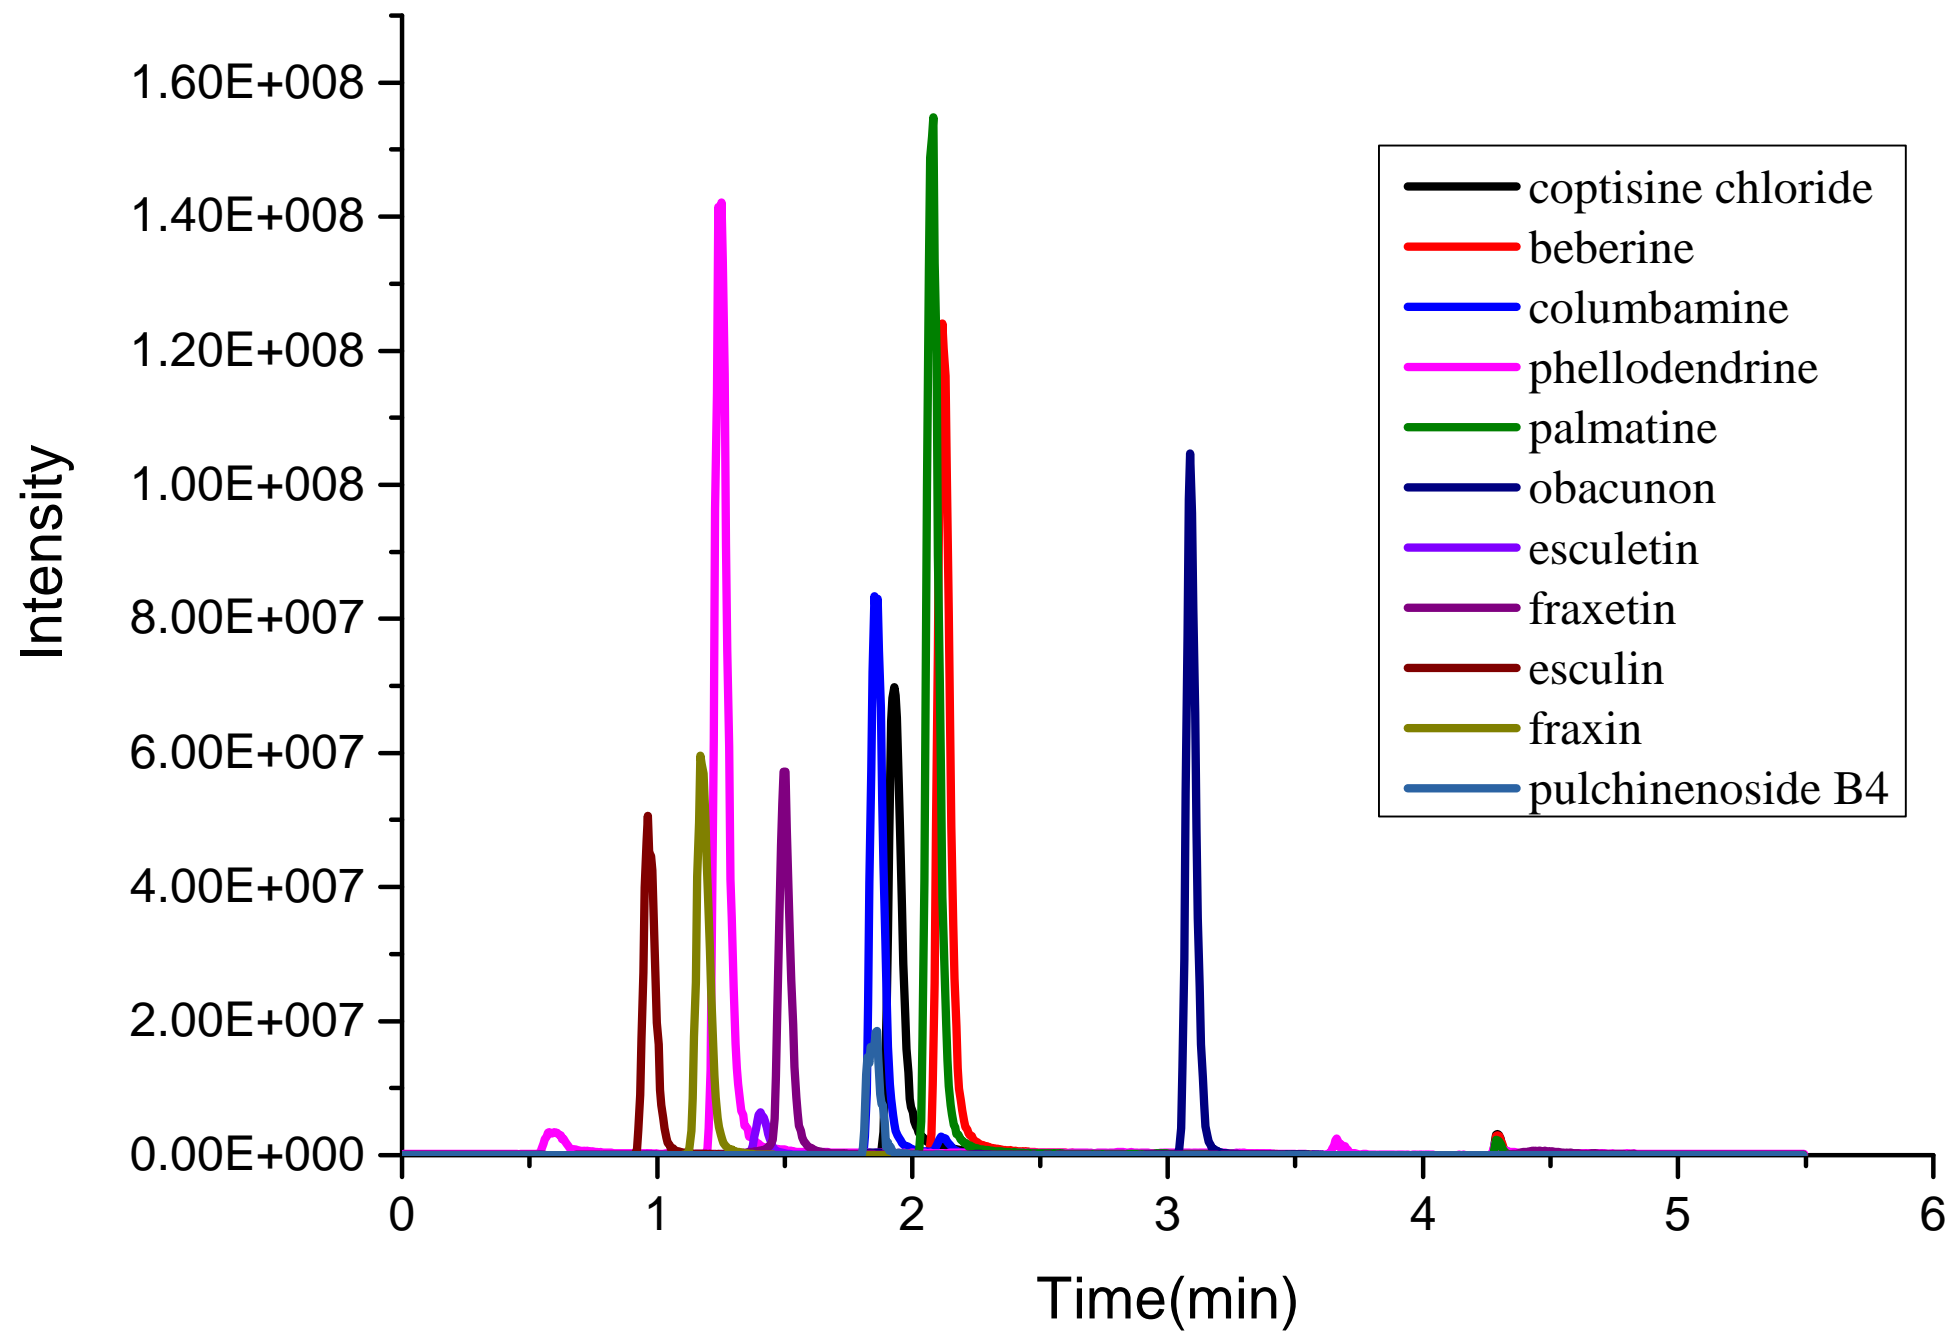

Supplement: f1 [file 5535752.f1.pdf]
